# Supplementary material for: Fully moderated t-statistic in linear modeling of mixed effects for differential expression analysis
Source: PubMed Central journal article supplement (PMC6923909; doi:10.1186/s12859-019-3248-9), 2019-12-20
Supplement: 12859_2019_3248_MOESM1_ESM.pdf [file 12859_2019_3248_MOESM1_ESM.pdf]

## Supplemental Figures:

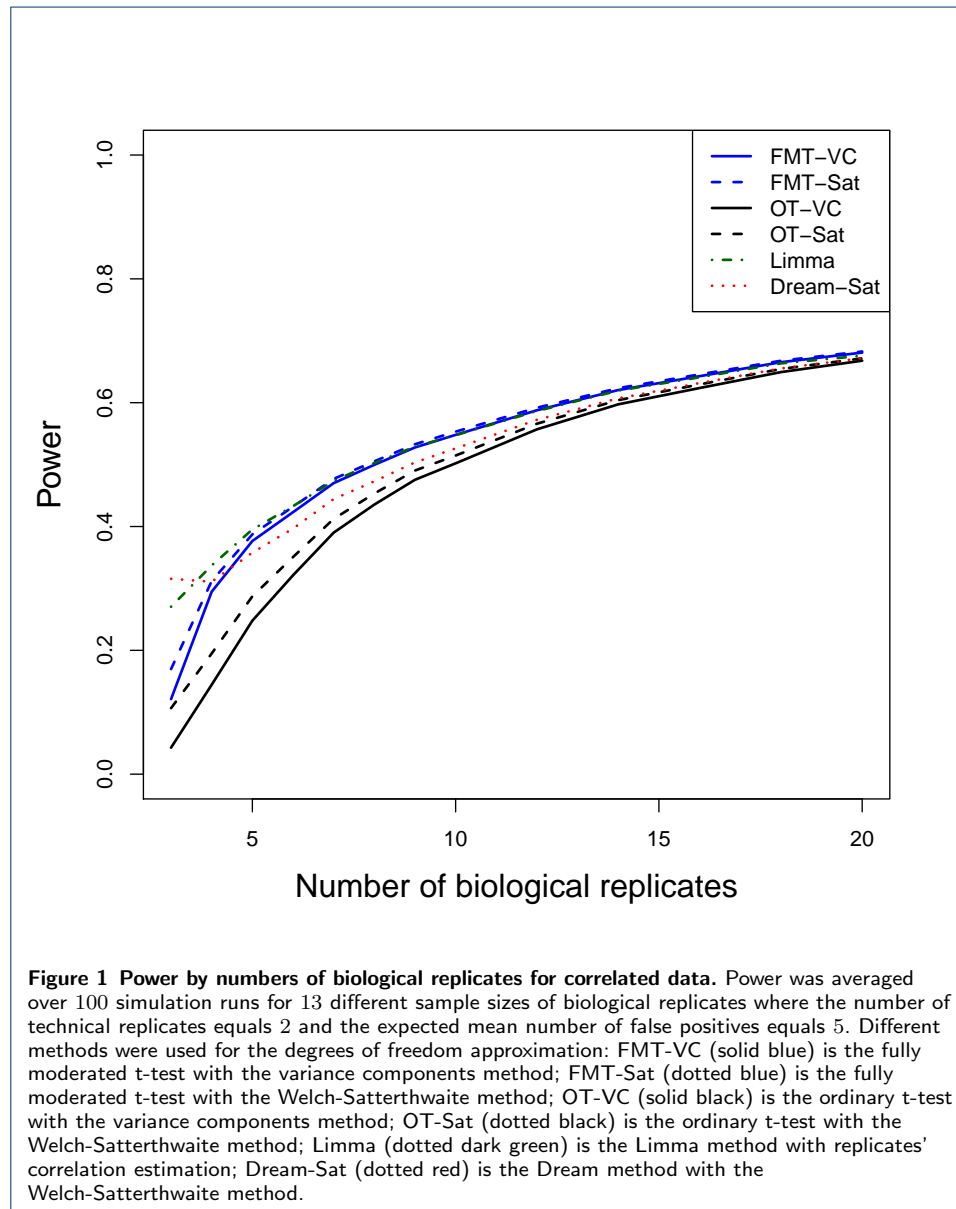

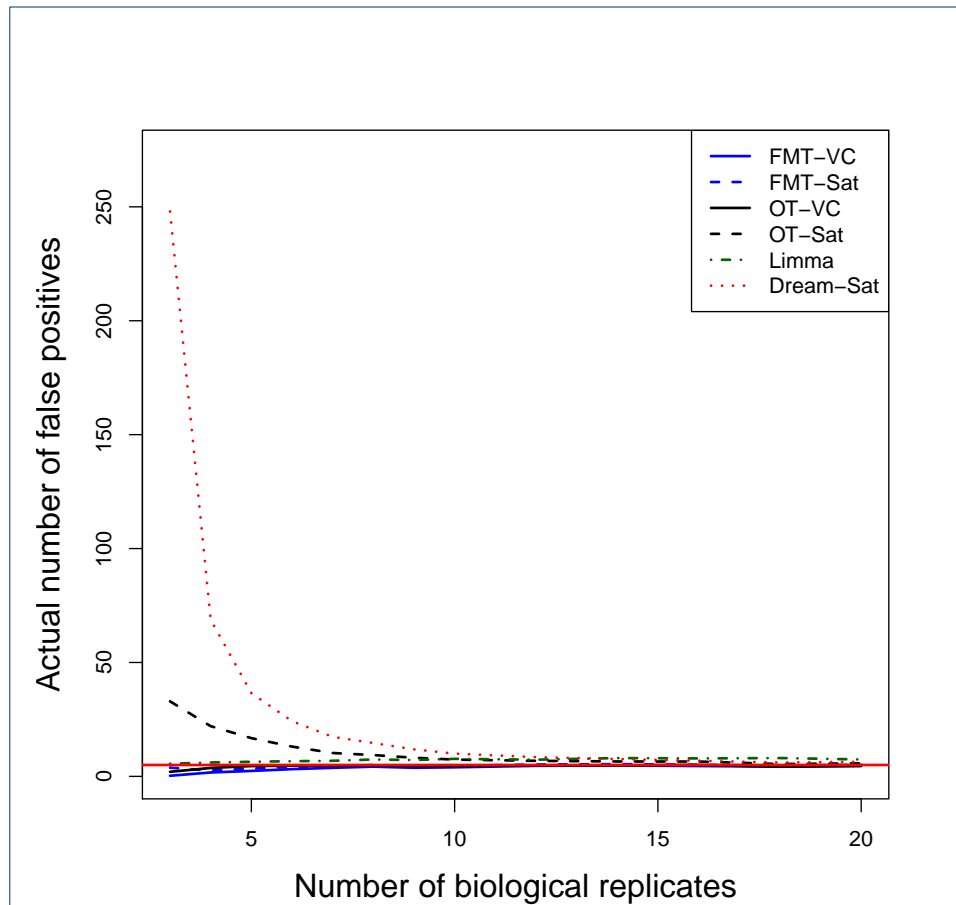

**Figure 2 False positives by numbers of biological replicates for correlated data.** Actual number of false positives was averaged over 100 simulation runs for 13 different sample sizes of biological replicates where the number of technical replicates equals 2 and the expected mean number of false positives equals 5. Different methods were used for the degrees of freedom approximation: FMT-VC (solid blue) is the fully moderated t-test with the variance components method; FMT-Sat (dotted blue) is the fully moderated t-test with the Welch-Satterthwaite method; OT-VC (solid black) is the ordinary t-test with the variance components method; OT-Sat (dotted black) is the ordinary t-test with the Welch-Satterthwaite method; Limma (dotted dark green) is the Limma method with replicates' correlation estimation; Dream-Sat (dotted red) is the Dream method with the Welch-Satterthwaite method.

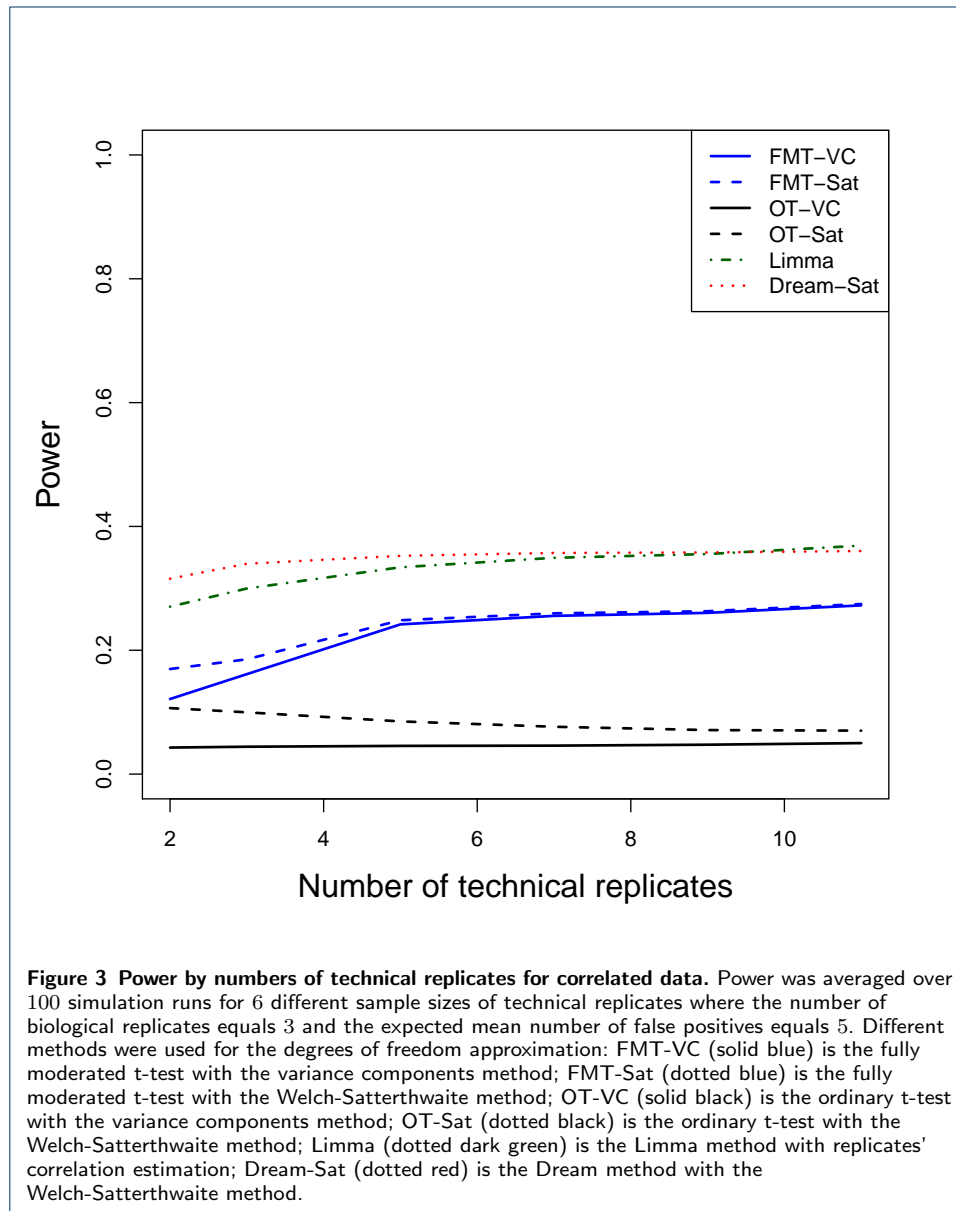

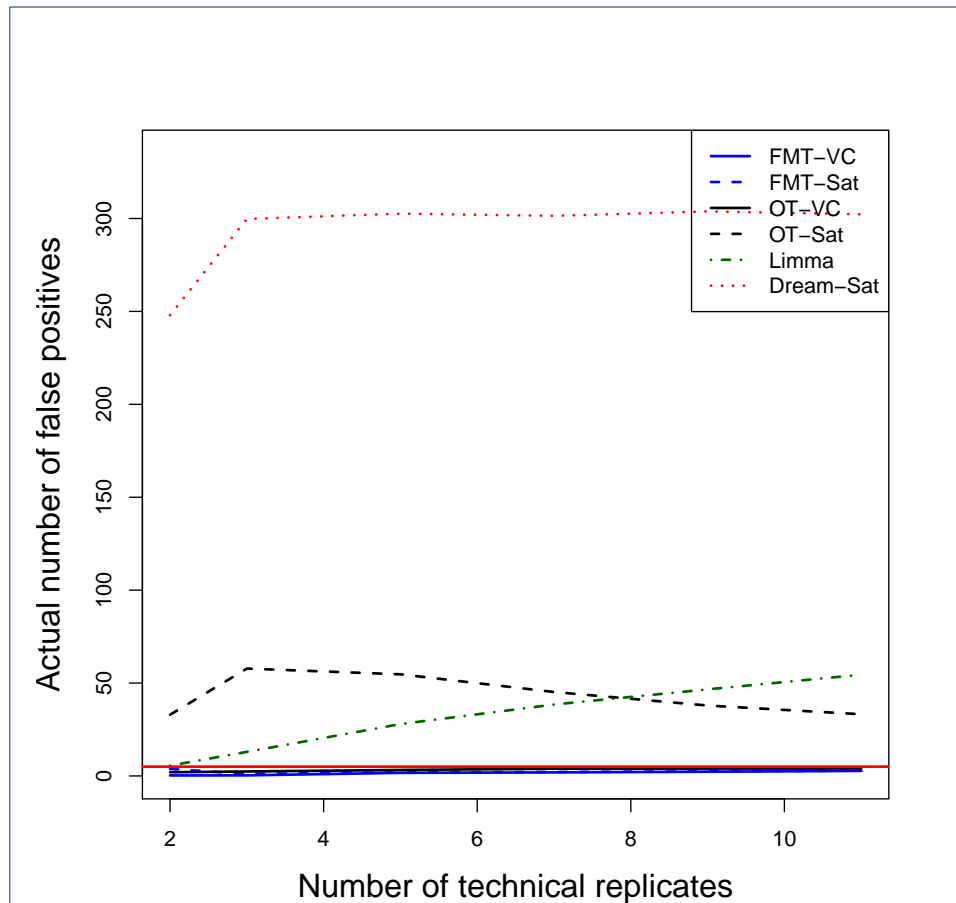

**Figure 4 False positives by numbers of technical replicates for correlated data.** Actual number of false positives was averaged over 100 simulation runs for 6 different sample sizes of technical replicates where the number of biological replicates equals 3 and the expected mean number of false positives equals 5. Different methods were used for the degrees of freedom approximation: FMT-VC (solid blue) is the fully moderated t-test with the variance components method; FMT-Sat (dotted blue) is the fully moderated t-test with the Welch-Satterthwaite method; OT-VC (solid black) is the ordinary t-test with the variance components method; OT-Sat (dotted black) is the ordinary t-test with the Welch-Satterthwaite method; Limma (dotted dark green) is the Limma method with replicates' correlation estimation; Dream-Sat (dotted red) is the Dream method with the Welch-Satterthwaite method.
